# Supplementary material
Source: PubMed Central journal article supplement (PMC3320948)
Supplement: supp_M111.337048_jbc.M111.337048-1.pdf [file supp_M111.337048_jbc.M111.337048-1.pdf]

**FIGURE S1**

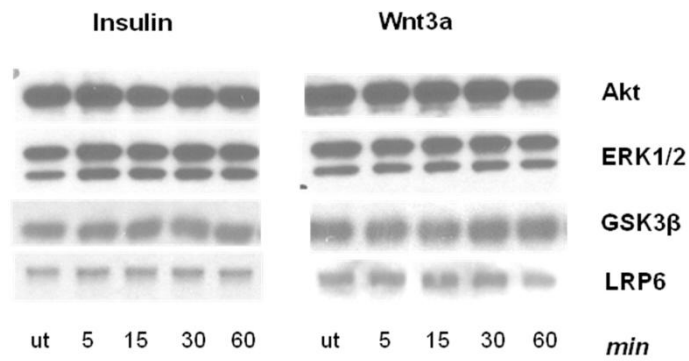

**FIGURE S1. Total protein levels for insulin and Wnt3a stimulations in 3T3-L1 preadipocytes.** 3T3-L1 preadipocytes were stimulated with either insulin (100 nM), wnt3a (75 ng/ml), or a combination of the two for various time points up to 60 minutes. Total cell extracts were made and used directly for western blot analysis determining total levels of Akt, ERK1/2, GSK3 $\beta$ , and LRP6. Phosphorylation results are shown in Figure 1.
