# Supplementary material
Source: PubMed Central journal article supplement (PMC3320948)
Supplement: supp_M111.337048_jbc.M111.337048-3.pdf [file supp_M111.337048_jbc.M111.337048-3.pdf]

**FIGURE S3**

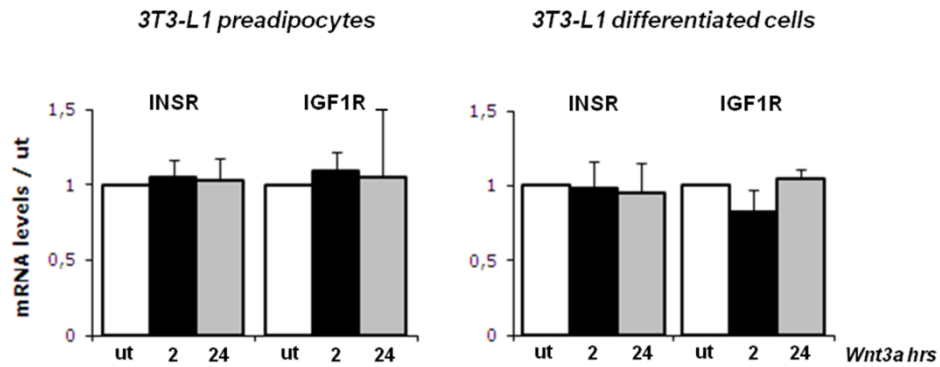

**FIGURE S3. INSR and IGF1R mRNA levels following Wnt3a stimulation.** Total mRNA was isolated after various times of insulin and Wnt3a treatments in preadipocytes and differentiated control 3T3-L1 cells and used for quantitative RT-PCR analysis determining INSR and IGF1R gene expression. Error bars are shown as SD (n=2).
