# Supplementary material
Source: PubMed Central journal article supplement (PMC3320948)
Supplement: supp_M111.337048_jbc.M111.337048-4.pdf [file supp_M111.337048_jbc.M111.337048-4.pdf]

**FIGURE S4**

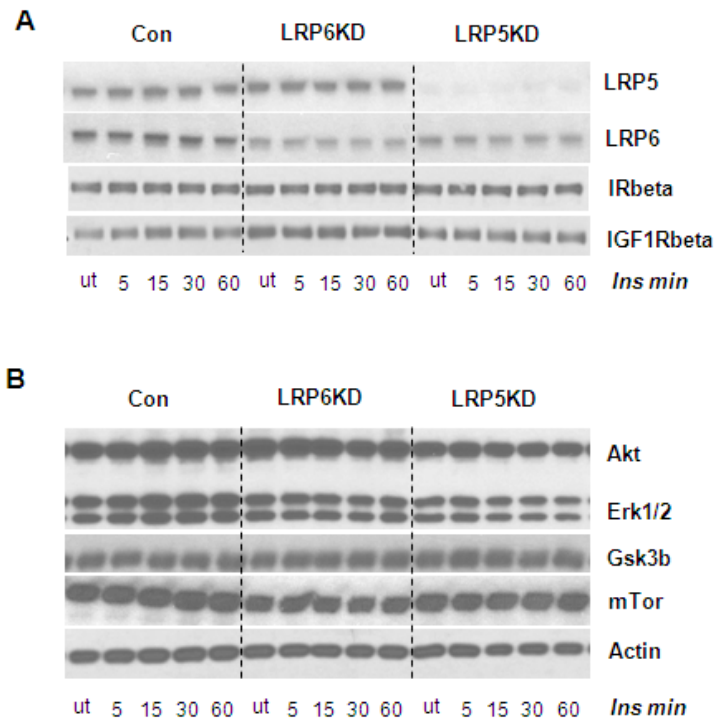

**FIGURE S4. Total protein levels in control, LRP5 KD, and LRP6 KD preadipocytes.** A, Total protein determination for LRP5, LRP6, IR, and IGF1R in control, LRP5KD, and LRP6KD preadipocytes. B, Total protein determination of Akt, ERK1/2, GSK3 $\beta$ , and mTOR in control and KD cells. Cells were stimulated with 100 nM insulin and the phosphorylation response can be seen in Figure 6.
