# Supplementary material
Source: PubMed Central journal article supplement (PMC3320948)
Supplement: supp_M111.337048_jbc.M111.337048-5.pdf [file supp_M111.337048_jbc.M111.337048-5.pdf]

FIGURE S5

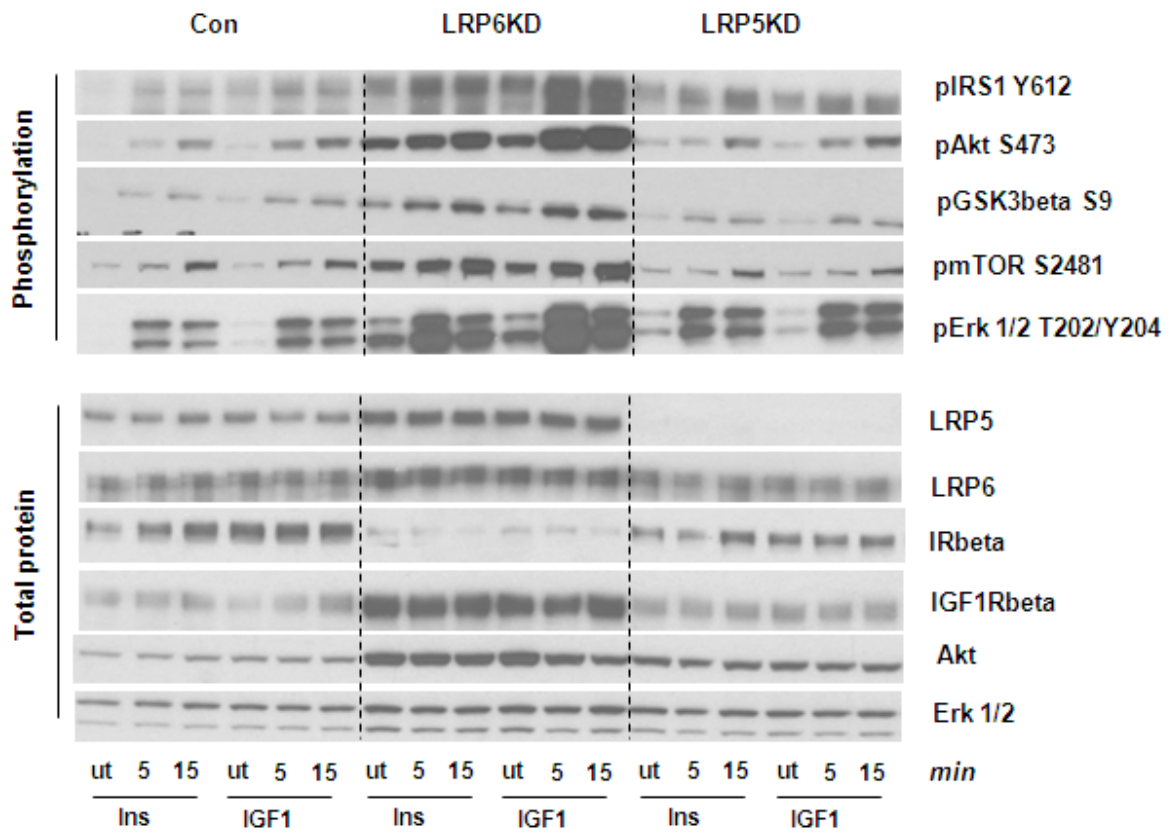

FIGURE S5. **Insulin and IGF-1 signaling in LRP5 and LRP6 KD mature adipocytes.** Phosphorylation of selected proteins in response to insulin and IGF-1 was assessed by western blotting in control, LRP5 KD, and LRP6 KD cells after adipose differentiation.
